# Supplementary material for: No Child Left Alone: Moral Judgments about Parents Affect Estimates of Risk to Children
Source: Oxford University Press journal article supplement (doi:10.1525/collabra.33), 2016-01-01
Supplement: s3-collabra-33_thomas.pdf [file s3-collabra-33_thomas.pdf]

## APPENDIX C. ANALYSIS OF DEMOGRAPHIC EFFECTS

Table 1: *Experiment 1*

| Factor          | Degrees of Freedom | <i>F</i> Value | <i>p</i> value |
|-----------------|--------------------|----------------|----------------|
| Moral condition | (4, 656)           | 10.87 ***      | <.001          |
| Parental Status | (1,111)            | 2.13           | .15            |
| Political Views | (4,111)            | 0.91           | .46            |
| Gender          | (1,111)            | 2.89           | .09            |
| Race            | (4,111)            | 1.96           | .10            |
| Education Level | (4,111)            | 0.63           | .64            |
| Age             | (39,111)           | 1.57 *         | .04            |

Note. \* $p < .05$ , \*\* $p < .01$ , \*\*\* $p < .001$

Table 2: *Experiment 2*

| Factor          | Degrees of Freedom | <i>F</i> Value | <i>p</i> value |
|-----------------|--------------------|----------------|----------------|
| Moral condition | (4, 616)           | 10.26 ***      | <.001          |
| Parental Status | (1,100)            | 6.92**         | .010           |
| Political Views | (4,100)            | 0.93           | .45            |
| Gender          | (1, 100)           | 6.40*          | .01            |
| Race            | (4, 100)           | 1.03           | .40            |
| Education Level | (4, 100)           | 1.19           | .32            |
| Age             | (39, 100)          | 1.13           | .31            |

Note. \* $p < .05$ , \*\* $p < .01$ , \*\*\* $p < .001$

Table 3: *Experiment 3*

| Factor          | Degrees of Freedom | <i>F</i> Value | <i>p</i> value |
|-----------------|--------------------|----------------|----------------|
| Moral condition | (4, 616)           | 8.57 ***       | <.001          |
| Parental Status | (1,100)            | 5.24*          | .02            |
| Political Views | (4,100)            | 0.50           | .74            |
| Gender          | (1, 100)           | 11.92***       | <.001          |
| Race            | (4, 100)           | 4.78***        | <.001          |
| Education Level | (4, 100)           | 3.11*          | .01            |
| Age             | (39, 100)          | 1.44           | .07            |

Note. \* $p < .05$ , \*\* $p < .01$ , \*\*\* $p < .001$

Table 4: *Experiment 4*

| Factor          | Degrees of Freedom | <i>F</i> Value | <i>p</i> value |
|-----------------|--------------------|----------------|----------------|
| Moral condition | (4, 1216)          | 41.88 ***      | <.001          |
| Parental Status | (1,241)            | 6.73*          | .01            |
| Political Views | (4, 241)           | 3.92**         | .004           |
| Gender          | (1, 241)           | 13.75***       | <.001          |
| Race            | (5, 241)           | 1.17           | .33            |
| Education Level | (6, 241)           | 1.78           | .10            |
| Age             | (46, 241)          | 1.19           | .20            |

Note. \* $p < .05$ , \*\* $p < .01$ , \*\*\* $p < .001$

Table 5: *Experiment 5*

| Factor          | Degrees of Freedom | <i>F</i> Value | <i>p</i> value |
|-----------------|--------------------|----------------|----------------|
| Moral condition | (4, 612)           | 7.46 ***       | <.001          |
| Parental Status | (1,100)            | 3.49           | .06            |
| Political Views | (4, 100)           | .58            | .68            |
| Gender          | (1, 100)           | 16.92***       | <.001          |
| Race            | (5, 100)           | 0.59           | .71            |
| Education Level | (6, 100)           | 1.40           | .22            |
| Age             | (37, 100)          | 1.09           | .36            |

Note. \* $p < .05$ , \*\* $p < .01$ , \*\*\* $p < .001$

Table 6: *Experiment 6*

| Factor                                    | Degrees of Freedom | <i>F</i> Value | <i>p</i> value |
|-------------------------------------------|--------------------|----------------|----------------|
| Moral condition                           | (4, 2428)          | 73.08 ***      | <.001          |
| Moral Condition x<br>Experiment Condition | (8,2428)           | 2.47           | .01            |
| Parental Status                           | (1,291)            | 28.12**        | <.001          |
| Political Views                           | (4, 291)           | 1.58           | .18            |
| Gender                                    | (1, 291)           | 38.15          | <.001          |
| Race                                      | (5, 291)           | 1.39           | .21            |
| Education Level                           | (6, 291)           | 0.86           | .52            |
| Age                                       | (54, 291)          | .91            | .66            |

Note. \* $p < .05$ , \*\* $p < .01$ , \*\*\* $p < .001$
